# Supplementary material for: Gonadotropin Stimulation Has Only a Limited Effect on the Concentration of Follicular Fluid Signalling Proteins: An Antibody Array Analysis
Source: Hindawi journal article supplement (doi:10.1155/2021/2906164), 2021-01-27
Supplement: f1 [file 2906164.f1.pdf]

| Block | Column | Row | ID    | Name                                       | log(FC*) | AveExpr | P Value | adj. P Value |
|-------|--------|-----|-------|--------------------------------------------|----------|---------|---------|--------------|
| 19    | 1      | 4   | S4813 | a1 syntrophin                              | -0.1711  | 7.54    | 0.2159  | 0.970        |
| 11    | 1      | 2   | H9161 | Acetyl & phospho Histone H3(Ac-Lys9,pS10)  | 0.0680   | 7.72    | 0.8352  | 0.988        |
| 11    | 4      | 2   | H9286 | Acetyl-Histone H3 (Ac-Lys9)                | 0.0215   | 7.13    | 0.8421  | 0.981        |
| 21    | 2      | 1   | A8967 | Amyloid Precursor Protein (APP)            | 0.0183   | 7.69    | 0.6303  | 0.981        |
| 21    | 4      | 1   | A8717 | Amyloid Precursor Protein (APP) C-terminal | 0.0042   | 7.73    | 0.7526  | 0.988        |
| 12    | 3      | 1   | A7674 | Aop-1                                      | 0.0314   | 6.56    | 0.1415  | 0.693        |
| 9     | 1      | 3   | A5968 | Ap-1/cjun                                  | 0.0312   | 7.39    | 0.2038  | 0.960        |
| 1     | 2      | 1   | A7549 | Apoptosis Inducing Factor (AIF)            | 0.0090   | 7.78    | 0.4228  | 0.972        |
| 24    | 4      | 3   | A4721 | ARNO (Cytohesin 2)                         | -0.0253  | 6.74    | 0.2400  | 0.970        |
| 1     | 3      | 1   | A4471 | ARTS                                       | -0.0099  | 6.50    | 0.7126  | 0.981        |
| 9     | 4      | 3   | A4086 | ATF2                                       | 0.0146   | 7.34    | 0.1475  | 0.949        |
| 1     | 4      | 3   | B0431 | Bcl-10                                     | 0.0071   | 7.69    | 0.7494  | 0.981        |
| 1     | 2      | 2   | B9304 | Bcl-x                                      | -0.0195  | 7.34    | 0.6036  | 0.977        |
| 1     | 3      | 2   | B9429 | Bcl-xL                                     | 0.0101   | 6.86    | 0.8021  | 0.988        |
| 20    | 2      | 2   | N7155 | b-NOS                                      | -0.1755  | 7.87    | 0.3395  | 0.972        |
| 20    | 3      | 2   | N2280 | b-NOS                                      | 0.3834   | 8.37    | 0.8022  | 0.988        |
| 24    | 1      | 1   | S1436 | b-Synuclein (PNP-14)                       | 0.0403   | 5.97    | 0.3685  | 0.971        |
| 5     | 4      | 1   | A5844 | c-Abl                                      | 0.0016   | 6.91    | 0.9341  | 0.988        |
| 12    | 3      | 3   | C1956 | Calcineurin                                | 0.0189   | 6.70    | 0.5913  | 0.976        |
| 12    | 2      | 4   | C0931 | Calmodulin                                 | 0.0009   | 7.46    | 0.2745  | 0.970        |
| 13    | 1      | 1   | C4731 | Calnexin                                   | 0.0159   | 7.29    | 0.6464  | 0.981        |
| 13    | 3      | 1   | C2687 | Calponin                                   | -0.0051  | 6.86    | 0.6378  | 0.982        |
| 13    | 2      | 2   | C4606 | Calreticulin                               | -0.0042  | 7.43    | 0.5043  | 0.965        |
| 25    | 1      | 2   | C6974 | CAM Kinase IIa                             | -0.0005  | 7.43    | 0.8592  | 0.981        |
| 25    | 3      | 2   | C2851 | CAM Kinase IV (Ay-18)                      | -0.0175  | 7.47    | 0.2471  | 0.961        |
| 3     | 4      | 2   | C1229 | Caspase 10                                 | -0.0107  | 6.58    | 0.4812  | 0.977        |
| 3     | 2      | 2   | C8351 | Caspase 10                                 | -0.0050  | 7.56    | 0.8603  | 0.981        |
| 3     | 2      | 3   | C1354 | Caspase 11                                 | -0.0019  | 7.74    | 0.8428  | 0.982        |
| 3     | 3      | 3   | C7611 | Caspase 12                                 | -0.0020  | 6.84    | 0.9090  | 0.988        |
| 1     | 1      | 3   | C9598 | Caspase 3                                  | 0.0022   | 7.84    | 0.6572  | 0.981        |
| 1     | 2      | 4   | C8487 | Caspase 3 - Active                         | -0.0358  | 7.65    | 0.0148  | 0.593        |
| 2     | 4      | 1   | C3392 | Caspase 4                                  | -0.0677  | 5.95    | 0.2476  | 0.923        |
| 2     | 2      | 1   | C4481 | Caspase 4                                  | 0.0106   | 6.41    | 0.6394  | 0.983        |
| 2     | 1      | 2   | C6979 | Caspase 5                                  | -0.0161  | 6.75    | 0.3085  | 0.971        |

|    |   |         |                    |         |      |        |       |
|----|---|---------|--------------------|---------|------|--------|-------|
| 2  | 4 | 2 C7599 | Caspase 6          | -0.0046 | 7.64 | 0.7546 | 0.988 |
| 2  | 2 | 3 C7724 | Caspase 7          | 0.0078  | 7.82 | 0.7000 | 0.981 |
| 2  | 1 | 4 C3101 | Caspase 8          | -0.0183 | 7.43 | 0.1086 | 0.842 |
| 2  | 4 | 3 C4106 | Caspase 8          | 0.0319  | 6.75 | 0.2667 | 0.970 |
| 3  | 4 | 1 C4356 | Caspase 9          | 0.0007  | 6.67 | 0.4605 | 0.977 |
| 3  | 2 | 4 C0715 | Cathepsin D        | -0.0327 | 5.85 | 0.3830 | 0.965 |
| 5  | 1 | 2 C0349 | Cdc25              | 0.0107  | 7.17 | 0.7409 | 0.981 |
| 5  | 3 | 2 C7104 | Cdc27              | -0.0032 | 6.63 | 0.8845 | 0.988 |
| 5  | 2 | 3 C0224 | CDC6               | 0.0103  | 7.49 | 0.4141 | 0.976 |
| 29 | 1 | 1 C6613 | Cdc7 Kinase        | 0.0387  | 6.71 | 0.3943 | 0.972 |
| 5  | 3 | 3 C7855 | Cdh1               | 0.0222  | 6.74 | 0.0686 | 0.743 |
| 5  | 1 | 4 C8218 | Cdk4               | 0.0034  | 7.40 | 0.8414 | 0.988 |
| 6  | 2 | 1 C8343 | Cdk6               | 0.0080  | 7.02 | 0.8547 | 0.988 |
| 6  | 4 | 1 C7089 | Cdk-7/cak          | -0.0212 | 6.73 | 0.0988 | 0.818 |
| 6  | 1 | 2 C9358 | Chk1               | -0.0267 | 6.96 | 0.0921 | 0.875 |
| 6  | 4 | 2 C9233 | Chk2               | -0.0288 | 6.95 | 0.0571 | 0.772 |
| 6  | 1 | 3 C3956 | c-myc              | 0.0239  | 7.83 | 0.4758 | 0.977 |
| 6  | 3 | 3 M5546 | c-Myc              | -0.0093 | 6.60 | 0.7759 | 0.981 |
| 21 | 2 | 2 C5922 | CNPase             | -0.0014 | 6.68 | 0.2410 | 0.961 |
| 21 | 4 | 2 C8736 | Cofilin            | -0.0098 | 7.95 | 0.5019 | 0.977 |
| 25 | 3 | 1 C0978 | CRK-L              | -0.0019 | 7.29 | 0.8990 | 0.988 |
| 9  | 1 | 4 C5112 | CUG-BP1            | 0.0145  | 7.11 | 0.3551 | 0.976 |
| 7  | 1 | 1 C4210 | Cyclin A           | 0.0415  | 6.81 | 0.2308 | 0.787 |
| 7  | 3 | 1 C4710 | Cyclin A           | -0.0149 | 6.30 | 0.2365 | 0.968 |
| 7  | 2 | 2 C8831 | Cyclin B1          | -0.0050 | 7.17 | 0.8916 | 0.988 |
| 7  | 4 | 2 C7464 | Cyclin D1          | -0.0090 | 6.38 | 0.7255 | 0.981 |
| 7  | 1 | 3 C7339 | Cyclin D2          | 0.0121  | 7.25 | 0.4271 | 0.976 |
| 7  | 4 | 3 C7214 | Cyclin D3          | 0.0006  | 7.03 | 0.5202 | 0.977 |
| 4  | 1 | 1 C3095 | Cystatin A         | 0.0496  | 6.59 | 0.0236 | 0.659 |
| 4  | 1 | 2 D2178 | DAP-Kinase         | 0.0178  | 6.72 | 0.1870 | 0.768 |
| 4  | 3 | 1 D7810 | DAXX               | 0.0721  | 6.97 | 0.1578 | 0.949 |
| 21 | 1 | 3 D0180 | DOPA Decarboxylase | 0.0277  | 6.23 | 0.5981 | 0.977 |
| 21 | 3 | 3 D8043 | Dystrophin         | 0.0081  | 6.85 | 0.5881 | 0.981 |
| 6  | 2 | 4 E9026 | E2F1               | 0.0154  | 7.20 | 0.7780 | 0.981 |
| 25 | 1 | 3 E3138 | EGF receptor       | 0.0211  | 6.46 | 0.2888 | 0.961 |

|    |   |   |       |                                              |         |      |        |       |
|----|---|---|-------|----------------------------------------------|---------|------|--------|-------|
| 20 | 4 | 3 | N3893 | e-NOS                                        | -0.0346 | 7.88 | 0.1946 | 0.960 |
| 20 | 2 | 3 | N2643 | e-NOS                                        | -0.1091 | 6.86 | 0.4039 | 0.972 |
| 20 | 1 | 4 | N9532 | e-NOS                                        | -0.0066 | 7.48 | 0.7073 | 0.981 |
| 25 | 1 | 4 | E1523 | ERK5 (Big MAPK-BMK1)                         | 0.0004  | 7.72 | 0.8573 | 0.981 |
| 25 | 3 | 3 | E0521 | Estrogen Receptor (ER)                       | -0.0067 | 7.82 | 0.5462 | 0.981 |
| 26 | 1 | 1 | F2918 | FAK (focal adhesion kinase)                  | 0.0105  | 7.63 | 0.5436 | 0.981 |
| 26 | 4 | 1 | F9051 | FAK Phospho (pS772)                          | -0.0252 | 6.55 | 0.0919 | 0.759 |
| 26 | 1 | 2 | F9301 | FAK Phospho (pS910)                          | -0.0196 | 6.53 | 0.3408 | 0.976 |
| 26 | 1 | 3 | F7926 | FAK phospho (pY397)                          | -0.0314 | 6.14 | 0.4203 | 0.977 |
| 26 | 4 | 2 | F8926 | FAK Phospho (pY577)                          | -0.0433 | 6.21 | 0.5463 | 0.977 |
| 4  | 2 | 3 | G6916 | GADD 153 (CHOP-10)                           | 0.0233  | 7.86 | 0.1862 | 0.914 |
| 24 | 2 | 4 | G6666 | GAP1                                         | -0.0230 | 6.74 | 0.1143 | 0.903 |
| 21 | 1 | 4 | G9038 | Glutamate receptor NMDAR 2a                  | 0.0234  | 7.20 | 0.4149 | 0.976 |
| 22 | 1 | 1 | G5163 | Glutamic Acid Decarboxylase (GAD65/67)       | 0.0967  | 7.50 | 0.0187 | 0.620 |
| 22 | 4 | 1 | G2781 | Glutamine Synthetase                         | 0.0006  | 7.21 | 0.9431 | 0.988 |
| 26 | 4 | 3 | G2791 | GRB-2                                        | -0.0185 | 6.60 | 0.5960 | 0.977 |
| 25 | 1 | 1 | G6541 | GRP1(ARNO3 Cytohesin-3)                      | 0.0301  | 6.70 | 0.5512 | 0.981 |
| 10 | 2 | 1 | H7161 | HAT1 ( Histone acetyltransferase)            | 0.0188  | 7.08 | 0.6534 | 0.983 |
| 10 | 4 | 1 | H3284 | HDAC 1 (Histone Deacetylase 1)               | -0.0139 | 7.87 | 0.2398 | 0.961 |
| 10 | 1 | 2 | H3159 | HDAC 2 (Histone Deacetylase 2)               | -0.0077 | 7.62 | 0.5829 | 0.977 |
| 10 | 4 | 2 | H9536 | HDAC 4 (Histone Deacetylase 4)               | 0.0031  | 7.32 | 0.7799 | 0.981 |
| 10 | 1 | 4 | R3777 | hnRNP M3-M4                                  | -0.0008 | 6.80 | 0.9514 | 0.994 |
| 12 | 1 | 2 | H5147 | HSP 70                                       | -0.0241 | 6.19 | 0.5575 | 0.981 |
| 12 | 3 | 2 | H1775 | HSP 90                                       | 0.0215  | 6.27 | 0.2959 | 0.885 |
| 26 | 1 | 4 | I0505 | IkB a                                        | -0.0047 | 7.13 | 0.5766 | 0.976 |
| 20 | 3 | 1 | N9657 | i-NOS                                        | 0.0227  | 6.66 | 0.2432 | 0.961 |
| 20 | 1 | 1 | N7782 | i-NOS                                        | -0.0011 | 8.40 | 0.6931 | 0.981 |
| 27 | 2 | 2 | J4500 | JNK                                          | -0.0774 | 6.81 | 0.6278 | 0.982 |
| 27 | 3 | 2 | J4750 | JNK activated (diphosphorylated JNK)         | -0.0313 | 6.80 | 0.0467 | 0.751 |
| 22 | 2 | 3 | K3513 | KIF3A                                        | 0.0068  | 6.93 | 0.5505 | 0.976 |
| 28 | 4 | 1 | M7927 | MAP Kinase (ERK-1)                           | -0.0064 | 7.60 | 0.7597 | 0.981 |
| 28 | 1 | 1 | M5670 | MAP Kinase (ERK1+ERK2)                       | 0.0724  | 7.68 | 0.0321 | 0.700 |
| 28 | 1 | 2 | M8159 | MAP Kinase activated (diphosphorylated MAPK) | -0.0182 | 6.68 | 0.0879 | 0.875 |
| 28 | 3 | 2 | M7802 | MAP Kinase activated phosphothreonine        | -0.0062 | 6.67 | 0.5632 | 0.981 |
| 28 | 1 | 3 | M3682 | MAP Kinase activated phosphotyrosine         | 0.0049  | 6.42 | 0.6062 | 0.977 |

|    |   |   |       |                                                 |         |      |        |       |
|----|---|---|-------|-------------------------------------------------|---------|------|--------|-------|
| 28 | 1 | 4 | M3550 | MAP Kinase activated protein kinase-2 (MAKAPK2) | -0.0060 | 7.32 | 0.8072 | 0.988 |
| 31 | 2 | 2 | M3787 | MAP Kinase Phosphatase-1 (MKP-1)                | -0.0198 | 7.81 | 0.2225 | 0.960 |
| 28 | 3 | 3 | M3807 | MAPK non phosphorylated ERK                     | 0.0533  | 6.31 | 0.1021 | 0.914 |
| 27 | 2 | 4 | M8434 | Mcl-1                                           | -0.0070 | 7.64 | 0.7720 | 0.981 |
| 7  | 2 | 4 | M7815 | MDM2                                            | -0.0138 | 6.89 | 0.6859 | 0.981 |
| 27 | 1 | 1 | N2661 | NAK                                             | -0.0272 | 6.75 | 0.4194 | 0.976 |
| 12 | 1 | 3 | N2786 | Nedd 8                                          | -0.0131 | 7.01 | 0.4141 | 0.972 |
| 22 | 4 | 2 | N5408 | Nerve Growth Factor Receptor                    | -0.0313 | 6.02 | 0.0789 | 0.812 |
| 22 | 1 | 2 | N3908 | Nerve Growth Factor Receptor (NGFR p75)         | -0.0212 | 7.43 | 0.5292 | 0.981 |
| 23 | 4 | 2 | N0142 | Neurofilament 200                               | -0.0241 | 6.75 | 0.3989 | 0.977 |
| 23 | 2 | 2 | N4142 | Neurofilament 200                               | -0.0255 | 7.85 | 0.4586 | 0.976 |
| 27 | 4 | 1 | N8523 | NF-kB                                           | -0.0391 | 6.63 | 0.0515 | 0.731 |
| 22 | 4 | 3 | N1660 | Nicestrin                                       | -0.0266 | 7.45 | 0.0571 | 0.772 |
| 11 | 4 | 3 | N9527 | NTF2                                            | -0.0251 | 6.68 | 0.1697 | 0.960 |
| 24 | 3 | 2 | P1870 | p120CTN                                         | -0.0153 | 7.69 | 0.5609 | 0.981 |
| 8  | 1 | 1 | P2610 | p14 arf                                         | 0.0063  | 6.51 | 0.5661 | 0.977 |
| 8  | 3 | 1 | P0968 | p16INK4a/CDKN2                                  | -0.0016 | 6.64 | 0.3190 | 0.961 |
| 8  | 1 | 2 | P4354 | p19INK4d                                        | 0.0310  | 6.62 | 0.2556 | 0.971 |
| 8  | 4 | 2 | P1484 | p21Waf-1                                        | 0.0030  | 7.49 | 0.7961 | 0.981 |
| 8  | 1 | 3 | C3085 | p34cdc2                                         | 0.0035  | 6.91 | 0.6129 | 0.977 |
| 8  | 4 | 3 | P9489 | p35                                             | -0.0101 | 7.41 | 0.8287 | 0.981 |
| 27 | 2 | 3 | M0800 | p38 MAPK                                        | -0.0071 | 7.51 | 0.5242 | 0.977 |
| 27 | 3 | 3 | M8177 | p38 MAPK activated (diphosphorylated p38)       | -0.0147 | 6.71 | 0.3767 | 0.965 |
| 8  | 1 | 4 | P5813 | p53                                             | -0.0164 | 7.59 | 0.1119 | 0.949 |
| 9  | 2 | 1 | P2735 | p57kip2                                         | 0.0195  | 6.81 | 0.3719 | 0.972 |
| 9  | 4 | 1 | P3737 | p63                                             | -0.0084 | 7.41 | 0.5142 | 0.976 |
| 4  | 3 | 3 | P5367 | PAR4 (Prostate Apoptosis Response 4)            | -0.0138 | 7.89 | 0.8208 | 0.988 |
| 10 | 4 | 3 | P7493 | PCAF                                            | 0.0461  | 7.12 | 0.2356 | 0.970 |
| 4  | 1 | 4 | P1495 | Phosphatidylserine Receptor (PSR)               | -0.0070 | 6.86 | 0.9245 | 0.988 |
| 4  | 3 | 2 | D4941 | Phospho-DAPK (pS308)                            | 0.0114  | 7.24 | 0.6196 | 0.977 |
| 11 | 1 | 1 | H6409 | Phospho-Histone H3 (pS10) Clone:H3-P            | -0.0053 | 6.53 | 0.6458 | 0.977 |
| 11 | 3 | 1 | H9908 | Phospho-Histone H3 (pS28)                       | 0.0036  | 7.16 | 0.7122 | 0.981 |
| 29 | 2 | 2 | P5242 | Phospholipase A2 group V                        | 0.1301  | 8.36 | 0.6588 | 0.981 |
| 29 | 4 | 2 | P8104 | Phospholipase C g1                              | 0.3593  | 7.31 | 0.0863 | 0.875 |
| 29 | 4 | 1 | P3237 | Phospho-PAK (pS212)                             | 0.0063  | 6.71 | 0.7151 | 0.981 |

|    |   |         |                                                 |         |      |        |       |
|----|---|---------|-------------------------------------------------|---------|------|--------|-------|
| 30 | 2 | 2 P4112 | Phospho-PKB (pS473)                             | -0.0087 | 6.98 | 0.4184 | 0.977 |
| 30 | 3 | 2 P3862 | Phospho-PKB (pT308)                             | -0.0099 | 6.95 | 0.6517 | 0.981 |
| 32 | 4 | 1 P7114 | Phospho-Pyk2 (pY579)                            | 0.0105  | 6.49 | 0.7373 | 0.981 |
| 32 | 2 | 2 P6989 | Phospho-Pyk2 (pY579/580)                        | -0.0221 | 6.13 | 0.5278 | 0.977 |
| 32 | 3 | 2 P6739 | Phospho-Pyk2 (pY580)                            | 0.0108  | 6.35 | 0.6329 | 0.981 |
| 32 | 1 | 3 P6864 | Phospho-Pyk2 (pY881)                            | 0.0029  | 6.34 | 0.9179 | 0.988 |
| 32 | 2 | 4 R1151 | Phospho-Raf (pS621)                             | 0.0072  | 6.59 | 0.4813 | 0.976 |
| 9  | 2 | 2 R6878 | Phospho-Retinoblastoma (pS795)                  | -0.0065 | 6.75 | 0.4382 | 0.977 |
| 29 | 2 | 3 P3430 | Phosphoserine                                   | 0.1346  | 7.69 | 0.1486 | 0.949 |
| 24 | 1 | 2 T6819 | Phospho-Ta (pS199/202)                          | -0.0128 | 6.15 | 0.7591 | 0.981 |
| 29 | 1 | 4 P3555 | Phosphothreonine                                | 0.0368  | 7.84 | 0.6023 | 0.981 |
| 29 | 3 | 3 P1869 | Phosphotyrosine                                 | 0.0591  | 6.94 | 0.1925 | 0.960 |
| 30 | 2 | 1 P2482 | PKB /AKT                                        | 0.0021  | 6.15 | 0.7798 | 0.981 |
| 30 | 3 | 1 P1601 | PKB/AKT                                         | -0.0101 | 7.36 | 0.5113 | 0.977 |
| 30 | 2 | 3 P4334 | PKC a                                           | 0.0080  | 6.99 | 0.7615 | 0.981 |
| 30 | 3 | 3 P3203 | PKC b                                           | -0.0086 | 6.61 | 0.9024 | 0.981 |
| 31 | 1 | 1 P8083 | PKC g                                           | 0.0086  | 6.91 | 0.7367 | 0.981 |
| 30 | 2 | 4 P3328 | PKC g                                           | -0.0001 | 6.46 | 0.8563 | 0.981 |
| 31 | 3 | 1 P3987 | PKD                                             | -0.0021 | 7.37 | 0.8118 | 0.988 |
| 3  | 1 | 1 C7849 | Procaspase 8                                    | 0.0036  | 7.19 | 0.8348 | 0.988 |
| 31 | 3 | 2 P7979 | Protein phosphatase 1a                          | -0.0140 | 7.16 | 0.0976 | 0.869 |
| 31 | 2 | 3 P7482 | PTEN                                            | -0.0153 | 7.52 | 0.1608 | 0.910 |
| 31 | 4 | 3 P3487 | PTEN                                            | -0.0127 | 6.33 | 0.5254 | 0.977 |
| 32 | 2 | 1 P3902 | Pyk2                                            | 0.0355  | 7.33 | 0.4299 | 0.965 |
| 32 | 4 | 3 R5773 | RAF1                                            | -0.0064 | 7.20 | 0.6472 | 0.977 |
| 11 | 2 | 3 R4777 | RAN                                             | -0.0150 | 7.09 | 0.6574 | 0.981 |
| 23 | 4 | 1 S2407 | S-100                                           | -0.0580 | 7.24 | 0.6972 | 0.981 |
| 23 | 1 | 1 S2532 | S-100 b                                         | -0.0137 | 6.03 | 0.7115 | 0.981 |
| 31 | 2 | 4 S5188 | SGK (serum and glucocorticoid inducible kinase) | -0.0062 | 7.46 | 0.4105 | 0.977 |
| 5  | 2 | 1 S0941 | SMAC/DIABLO                                     | 0.0375  | 7.58 | 0.2153 | 0.915 |
| 9  | 3 | 2 S3934 | SMAD4                                           | 0.0584  | 7.61 | 0.3334 | 0.972 |
| 22 | 2 | 4 S9684 | SNAP-25                                         | -0.0043 | 7.63 | 0.6013 | 0.977 |
| 10 | 2 | 3 S8316 | SUV39H1 Histone Methyl Transferase              | 0.0228  | 6.65 | 0.4108 | 0.972 |
| 23 | 1 | 3 S2177 | Synaptotagmin                                   | -0.0180 | 7.41 | 0.1579 | 0.949 |
| 23 | 4 | 3 S0664 | Syntaxin                                        | -0.0535 | 6.52 | 0.3754 | 0.972 |

|    |   |         |                         |         |      |        |       |
|----|---|---------|-------------------------|---------|------|--------|-------|
| 23 | 2 | 4 S3062 | Synuclein a             | -0.0193 | 7.25 | 0.1274 | 0.789 |
| 11 | 2 | 4 T8573 | Topoisomerase-1         | -0.0130 | 6.88 | 0.7576 | 0.988 |
| 12 | 1 | 1 T1948 | Trf-1                   | 0.0243  | 6.71 | 0.5951 | 0.981 |
| 24 | 2 | 3 T0678 | Tryptophane Hydroxylase | 0.0033  | 6.20 | 0.7922 | 0.981 |
| 24 | 4 | 1 T2928 | Tyrosine Hydroxylase    | -0.0057 | 6.80 | 0.8667 | 0.988 |

---

\* **Fold Change**
